# Supplementary material
Source: PubMed Central journal article supplement (PMC4902614)
Supplement: supp_pp.16.00320_PP2016-00320DR1_Supplemental_Table_S1.pdf [file supp_pp.16.00320_PP2016-00320DR1_Supplemental_Table_S1.pdf]

Supplemental Table S1. Functionally confirmed TFBSs in *API* and *CAL* regulatory regions.

| <i>API</i> |          |             |          |                       |                                          |             |                                                                                                                                                                                                                                                                                                                                                                                                                            |                                                                                                                                                                                                                                                                      |
|------------|----------|-------------|----------|-----------------------|------------------------------------------|-------------|----------------------------------------------------------------------------------------------------------------------------------------------------------------------------------------------------------------------------------------------------------------------------------------------------------------------------------------------------------------------------------------------------------------------------|----------------------------------------------------------------------------------------------------------------------------------------------------------------------------------------------------------------------------------------------------------------------|
| No.        | Name     | Position    | Sequence | Putative cis-element  | Binding TF                               | Gene family | Gene expression pattern                                                                                                                                                                                                                                                                                                                                                                                                    | Gene function                                                                                                                                                                                                                                                        |
| 1          | LFY"     | -255 — -250 | CCACTG   | LFY binding site      | LEAFY                                    |             | <i>LFY</i> is weakly expressed in young leaves during the vegetative phase, and strongly expressed in young primordia surrounding the inflorescence apex.                                                                                                                                                                                                                                                                  | <i>LFY</i> controls the production of the flowers, and activates the floral homeotic genes that specify the identity of organs in the flower.                                                                                                                        |
| 2          | LFY      | -289 — -284 | CCAATG   | LFY binding site      | LEAFY                                    |             | <i>LFY</i> is weakly expressed in young leaves during the vegetative phase, and strongly expressed in young primordia surrounding the inflorescence apex.                                                                                                                                                                                                                                                                  | <i>LFY</i> controls the production of the flowers, and activates the floral homeotic genes that specify the identity of organs in the flower.                                                                                                                        |
| 3          | SPL9     | -301 — -298 | GTAC     | GTAC box              | SQUAMOSA PROMOTER-BINDING PROTEIN-LIKE 9 | SPL         | <i>SPL9</i> is strongly expressed in leaf primordia and provascular strands of young leaves. Its expression is transiently upregulated in floral anlagen and very early floral primordia, but declined again by stage 2 of flower development.                                                                                                                                                                             | <i>SPL9</i> promotes flowering in an FT/FD-independent manner.                                                                                                                                                                                                       |
| 4          | TCP4     | -316 — -309 | ATGGACCC | TCP4 binding site     | TCP FAMILY TRANSCRIPTION FACTOR 4        | TCP         | <i>TCP4</i> is broadly expressed in stems, leaves and flowers.                                                                                                                                                                                                                                                                                                                                                             | Nag et al., (2009) found that miR319a targeting of TCP4 is critical for petal growth and development.                                                                                                                                                                |
| 5          | PAN      | -376 — -373 | ACGT     | TGA binding site      | PERIANTHIA                               | bZIP        | <i>PAN</i> RNA is present in the inflorescence meristem, the floral meristem, and in developing petals, stamens, and carpels.                                                                                                                                                                                                                                                                                              | <i>PAN</i> plays roles in the control of perianth organ number specification, and the regulation of floral determinacy. It mediates BOP1 and 2 to the promoter of <i>API</i> , which activates expression of <i>API</i> to control floral transition and patterning. |
| 5          | FD       | -377 — -372 | GACGTC   | C-box                 | FLOWERING LOCUS D                        | bZIP        | <i>FD</i> is highly expressed at the shoot apex. Specifically, <i>FD</i> is expressed in leaf and floral anlagen. Its levels decrease soon after floral primordia start to express <i>API</i> .                                                                                                                                                                                                                            | <i>FD</i> could integrate temporal and spatial information that is already expressed at the shoot apex before floral induction, and promote flowering. A complex of FT and FD proteins can activate <i>API</i> .                                                     |
| 6          | LMI2     | -399 — -393 | ACTTACC  | R2R3 MYB binding site | LATE MERISTEM IDENTITY 2                 | R2R3 MYB    | <i>LMI2</i> is expressed throughout the shoot apical meristem of primary inflorescences, with the highest expression observed in the young flower primordia.                                                                                                                                                                                                                                                               | <i>LMI2</i> plays a role in the meristem identity transition.                                                                                                                                                                                                        |
| 7          | SPL3/9   | -411 — -404 | CCGTACAA | GTAC box              | TCP FAMILY TRANSCRIPTION FACTOR 3/9      | SPL         | <i>SPL3</i> is expressed in vegetative and inflorescence apical meristems, floral meristems, leaf and flower organ primordia, and inflorescence stem tissue. <i>SPL9</i> is strongly expressed in leaf primordia and provascular strands of young leaves. The expression of <i>SPL9</i> is transiently upregulated in floral anlagen and very early floral primordia, but declined again by stage 2 of flower development. | <i>SPL3</i> controls the timing of flower formation. <i>SPL9</i> promotes flowering in an FT/FD-independent manner.                                                                                                                                                  |
| 8          | LFY"     | -419 — -414 | CCAGTG   | LFY binding site      | LEAFY                                    |             | <i>LFY</i> is weakly expressed in young leaves during the vegetative phase, and strongly expressed in young primordia surrounding the inflorescence apex.                                                                                                                                                                                                                                                                  | <i>LFY</i> controls the production of the flowers, and activates the floral homeotic genes that specify the identity of organs in the flower.                                                                                                                        |
| 9          | bHLH     | -433 — -428 | CACTTG   | E-box                 | bHLH genes                               | bHLH        |                                                                                                                                                                                                                                                                                                                                                                                                                            |                                                                                                                                                                                                                                                                      |
| 10         | AP2/SMZ' | -487 — -482 | TTTGTT   |                       | APETALA 2/SCHLAFMUTZE                    | AP2         | <i>AP2</i> is expressed in the inflorescence meristem and in all four types of floral organs. <i>SMZ</i> is expressed in hypocotyl, cotyledons, meristematic region of 7-d-old seedlings, and seeds.                                                                                                                                                                                                                       | <i>AP2</i> plays a central role in the establishment of the floral meristem, the specification of floral organ identity and the regulation of floral homeotic gene expression. <i>SMZ</i> is a repressor of flowering.                                               |

|    |         |               |                      |                  |                                            |                     |                                                                                                                                                                                                                                                                                    |                                                                                                                                                                                                                                                                      |
|----|---------|---------------|----------------------|------------------|--------------------------------------------|---------------------|------------------------------------------------------------------------------------------------------------------------------------------------------------------------------------------------------------------------------------------------------------------------------------|----------------------------------------------------------------------------------------------------------------------------------------------------------------------------------------------------------------------------------------------------------------------|
| 11 | PI      | -603 — -594   | GCAAAATTGA           | CArG-box         | PISTILLATA                                 | MADS-box            | <i>PI</i> is expressed at inner three whorls of floral organs at stage 3, its expression in the whorl 4 region disappeared by stage 5. It remains present at high levels in the developing second and third whorls till stages 10 and 11.                                          | <i>PI</i> determines the identity of petals and stamens, by interacting with AP3.                                                                                                                                                                                    |
| 12 | Dof     | -658 — -651   | AAAGAAAG             | AAAG motif       | Dof genes                                  | Dof domain proteins |                                                                                                                                                                                                                                                                                    |                                                                                                                                                                                                                                                                      |
| 13 | SPL3    | -733 — -727   | CGTACAA              | GTAC box         | SQUAMOSA PROMOTER-BINDING PROTEIN-LIKE 3   | SPL                 | <i>SPL3</i> is expressed in vegetative and inflorescence apical meristems, floral meristems, leaf and flower organ primordia, and inflorescence stem tissues.                                                                                                                      | <i>SPL3</i> controls the timing of flower formation.                                                                                                                                                                                                                 |
| 14 | API     | -805 — -796   | CTATTTTGG            | CArG-box         | APETALA1                                   | MADS-box            | <i>API</i> is expressed in young floral primordia, sepals and petals.                                                                                                                                                                                                              | <i>API</i> plays roles in the formation of floral meristems, and specification of sepals and petals.                                                                                                                                                                 |
| 15 | SPL3    | -948 — -942   | CGTACAA              | GTAC box         | SQUAMOSA PROMOTER-BINDING PROTEIN-LIKE 3   | SPL                 | <i>SPL3</i> is expressed in vegetative and inflorescence apical meristems, floral meristems, leaf and flower organ primordia, and inflorescence stem tissues.                                                                                                                      | <i>SPL3</i> controls the timing of flower formation.                                                                                                                                                                                                                 |
| 15 | PAN     | -949 — -946   | ACGT                 | TGA binding site | PERIANTHIA                                 | bZIP                | <i>PAN</i> RNA is present in the inflorescence meristem, the floral meristem, and in developing petals, stamens, and carpels.                                                                                                                                                      | <i>PAN</i> plays roles in the control of perianth organ number specification, and the regulation of floral determinacy. It mediates BOP1 and 2 to the promoter of <i>API</i> , which activates expression of <i>API</i> to control floral transition and patterning. |
| 16 | AP2/SMZ | -1858 — -1853 | TTTGTT               |                  | APETALA 2/SCHLAFMUTZE                      | AP2                 | <i>AP2</i> is expressed in the inflorescence meristem and in all four types of floral organs. <i>SMZ</i> is expressed in hypocotyl, cotyledons, meristematic region of 7-d-old seedlings, and seeds.                                                                               | <i>AP2</i> plays a central role in the establishment of the floral meristem, the specification of floral organ identity and the regulation of floral homeotic gene expression. <i>SMZ</i> is a repressor of flowering.                                               |
| 17 | WRKY    | 1044 — 1049   | TTGACC               | W-box            | WRKY genes                                 | WRKY                |                                                                                                                                                                                                                                                                                    |                                                                                                                                                                                                                                                                      |
| 18 | SPL8    | 1253 — 1268   | TTTTCTGTACC<br>TAATT | GTAC box         | SQUAMOSA PROMOTER-BINDING PROTEIN-LIKE 8   | SPL                 | <i>SPL8</i> is lowly expressed in vegetative growth and highly expressed in inflorescences formed after the floral transition. It is also expressed in the developing pollen sacs of the anthers, the placental tissue of the developing gynoecium, and the margins of the petals. | <i>SPL8</i> is required for proper development of sporogenic tissues.                                                                                                                                                                                                |
| 19 | SPL4/7  | 3358 — 3364   | TTGTACG              | GTAC box         | SQUAMOSA PROMOTER-BINDING PROTEIN-LIKE 4/7 | SPL                 |                                                                                                                                                                                                                                                                                    |                                                                                                                                                                                                                                                                      |

#### Supplemental References

- Aggarwal P, Das Gupta M, Joseph AP, Chatterjee N, Srinivasan N, Nath U (2010) Identification of specific DNA binding residues in the TCP family of transcription factors in *Arabidopsis*. *Plant Cell* **22**: 1174-1189.
- Benlloch R, Kim MC, Sayou C, Thevenon E, Parcy F, Nilsson O (2011) Integrating long-day flowering signals: a LEAFY binding site is essential for proper photoperiodic activation of *APETALA1*. *Plant Journal* **67**: 1094-1102.
- Birkenbihl RP, Jach G, Saedler H, Huijser P (2005) Functional dissection of the plant-specific SBP-domain: overlap of the DNA-binding and nuclear localization domains. *Journal of Molecular Biology* **352**: 585-596.
- Cardon GH, Hohmann S, Nettesheim K, Saedler H, Huijser P (1997) Functional analysis of the *Arabidopsis thaliana* SBP-box gene *SPL3*: a novel gene involved in the floral transition. *Plant Journal* **12**: 367-377.
- Cheng S, van den Bergh E, Zeng P, Zhong X, Xu J, Liu X, Hofberger J, de Bruijn S, Bhide AS, Kuelahoglu C, et al (2013) The *Tarenaya hassleriana* genome provides insight into reproductive trait and genome evolution of crucifers. *Genome Biology* **14**: 1-14.
- Chuang CF, Running MP, Williams RW, Meyerowitz EM (1999) The *PERIANTHIA* gene encodes a bZIP protein involved in the determination of floral organ number in *Arabidopsis thaliana*. *Genes Dev* **13**: 334-344.
- Dinh TT, Girke T, Liu X, Yant L, Schmid M, Chen X (2012) The floral homeotic protein APETALA2 recognizes and acts through an AT-rich sequence element. *Development* **139**: 1978-1986.
- Foster R, Izawa T, Chua NH (1994) Plant bzip proteins gather at acgt elements. *FASEB Journal* **8**: 192-200.
- Fujimoto SY, Ohta M, Usui A, Shinshi H, Ohme-Takagi M (2000) *Arabidopsis* ethylene-responsive element binding factors act as transcriptional activators or repressors of GCC box-mediated gene expression. *Plant Cell* **12**: 393-404.
- Goto K, Meyerowitz EM (1994) Function and regulation of the *Arabidopsis* floral homeotic gene *pistillata*. *Genes Dev* **8**: 1548-1560.
- Hepworth SR, Zhang YL, McKim S, Li X, Haughn G (2005) BLADE-ON-PETIOLE-dependent signaling controls leaf and floral patterning in *Arabidopsis*. *Plant Cell* **17**: 1434-1448.
- Jiao Y, Wickett NJ, Ayyampalayam S, Chanderbali AS, Landherr L, Ralph PE, Tomsho LP, Hu Y, Liang H, Soltis PS, et al (2011) Ancestral polyploidy in seed plants and angiosperms. *Nature* **473**: 97-100.
- Jofuku KD, Denboer BGW, Vanmontagu M, Okamoto JK (1994) Control of *Arabidopsis* flower and seed development by the homeotic gene *APETALA2*. *Plant Cell* **6**: 1211-1225.
- Kaufmann K, Wellmer F, Muino JM, Ferrier T, Wuest SE, Kumar V, Serrano-Mislata A, Madueno F, Krajewski P, Meyerowitz EM, et al (2010) Orchestration of floral initiation by APETALA1. *Science* **328**: 85-89.
- Kramer EM, Dorit RL, Irish VF (1998) Molecular evolution of genes controlling petal and stamen development: duplication and divergence within the *APETALA3* and *PISTILLATA* MADS-box gene lineages. *Genetics* **149**: 765-778.

**Kramer EM, Jaramillo MA, Di Stilio VS** (2004) Patterns of gene duplication and functional evolution during the diversification of the *AGAMOUS* subfamily of MADS box genes in angiosperms. *Genetics* **166**: 1011–1023.

**Lawton-Rauh AL, Buckler IV ES, Purugganan MD** (1999) Patterns of molecular evolution among paralogous floral homeotic genes. *Mol Biol Evol* **16**: 1037–1045.

**Liu Y, Cui S, Wu F, Yan S, Lin X, Du X, Chong K, Schilling S, Theissen G, Meng Z** (2013) Functional conservation of MIKC\*-Type MADS box genes in *Arabidopsis* and rice pollen maturation. *Plant Cell* **25**: 1288–1303.

**Maier AT, Stehling-Sun S, Wollmann H, Demar M, Hong RL, Haubeiss S, Weigel D, Lohmann JU** (2009) Dual roles of the bZIP transcription factor PERIANTHIA in the control of floral architecture and homeotic gene expression. *Plant Cell* **21**: 1223–1235.

**Mandel MA, Gustafsonbrown C, Savidge B, Yanofsky MF** (1992) Molecular characterization of the *Arabidopsis* floral homeotic gene *APETALA1*. *Nature* **360**: 273–277.

**Mathieu J, Yant LJ, Murdter F, Kuttner F, Schmid M** (2009) Repression of flowering by the miR172 target SMZ. *PLoS Biol* **7**: e157.

**Nag A, King S, Jack T** (2009) miR319a targeting of *TCP4* is critical for petal growth and development in *Arabidopsis*. *Proceedings of the National Academy of Sciences, USA* **106**: 22534–22539.

**Parcy F, Nilsson O, Busch MA, Lee I, Weigel D** (1998) A genetic framework for floral patterning. *Nature* **395**: 561–566.

**Pastore JJ, Limpuangthip A, Yamaguchi N, Wu MF, Sang Y, Han SK, Malaspina L, Chavdaroff N, Yamaguchi A, Wagner D** (2011) LATE MERISTEM IDENTITY2 acts together with LEAFY to activate *APETALA1*. *Development* **138**: 1011–1020.

**Prouse MB, Campbell MM** (2012) The interaction between MYB proteins and their target DNA binding sites. *Biochimica Biophysica Acta Gene Regulatory Mechanisms* **1819**: 67–77.

**Rosinski JA, Atchley WR** (1998) Molecular evolution of the Myb family of transcription factors: Evidence for polyphyletic origin. *J Mol Evol* **46**: 74–83.

**Ruelens P, de Maagd RA, Proost S, Theissen G, Geuten K, Kaufmann K** (2013) FLOWERING LOCUS C in monocots and the tandem origin of angiosperm-specific MADS-box genes. *Nat Commun* **4**: 2280.

**Rushton PJ, Somssich IE, Ringler P, Shen QXJ** (2010) WRKY transcription factors. *Trends in Plant Science* **15**: 247–258.

**Saddic LA, Huvermann BR, Bezhani S, Su Y, Winter CM, Kwon CS, Collum RP, Wagner D** (2006) The LEAFY target LMI1 is a meristem identity regulator and acts together with LEAFY to regulate expression of *CAULIFLOW*. *Plant Cell* **18**: 1011–1020.

**Schauer SE, Schluter PM, Baskar R, Gheyselinck J, Bolaños A, Curtis MD, Grossniklaus U** (2009) Intronic regulatory elements determine the divergent expression patterns of *AGAMOUS-LIKE6* subfamily members in *Arabidopsis*. *Plant Cell* **21**: 1223–1235.

**Schmid M, Davison TS, Henz SR, Pape UJ, Demar M, Vingron M, Scholkopf B, Weigel D, Lohmann JU** (2005) A gene expression map of *Arabidopsis thaliana* development. *Nat Genet* **37**: 501–506.

**Shan H, Zhang N, Liu C, Xu G, Zhang J, Chen Z, Kong H** (2007) Patterns of gene duplication and functional diversification during the evolution of the *API/SQUA* subfamily of plant MADS-box genes. *Mol Phylogenet Evol* **44**: 209–218.

**Sundstrom JF, Nakayama N, Glimelius K, Irish VF** (2006) Direct regulation of the floral homeotic *APETALA1* gene by APETALA3 and PISTILLATA in *Arabidopsis*. *Plant Journal* **46**: 593–600.

**Toledo-Ortiz G, Huq E, Quail PH** (2003) The *Arabidopsis* basic/helix-loop-helix transcription factor family. *Plant Cell* **15**: 1749–1770.

**Unte US, Sorensen AM, Pesaresi P, Gandikota M, Leister D, Saedler H, Huijser P** (2003) SPL8, an SBP-Box gene that affects pollen sac development in *Arabidopsis*. *Plant Cell* **15**: 1009–1019.

**Wagner D, Sablowski RWM, Meyerowitz EM** (1999) Transcriptional activation of APETALA1 by LEAFY. *Science* **285**: 582–584.

**Wang JW, Czech B, Weigel D** (2009) miR156-regulated SPL transcription factors define an endogenous flowering pathway in *Arabidopsis thaliana*. *Cell* **138**: 738–749.

**Weigel D, Alvarez J, Smyth DR, Yanofsky MF, Meyerowitz EM** (1992) Leafy controls floral meristem identity in *Arabidopsis*. *Cell* **69**: 843–859.

**Wigge PA, Kim MC, Jaeger KE, Busch W, Schmid M, Lohmann JU, Weigel D** (2005) Integration of spatial and temporal information during floral induction in *Arabidopsis*. *Science* **309**: 1056–1059.

**William DA, Su YH, Smith MR, Lu M, Baldwin DA, Wagner D** (2004) Genomic identification of direct target genes of LEAFY. *Proceedings of the National Academy of Sciences, USA* **101**: 1775–1780.

**Winter CM, Austin RS, Blanvillain-Baufume S, Reback MA, Monniaux M, Wu MF, Sang Y, Yamaguchi A, Yamaguchi N, Parker JE, et al** (2011) LEAFY target genes reveal floral regulatory logic, cis motifs, and a link to bicoid. *Development* **138**: 1011–1020.

**Wuest SE, O'Maoileidigh DS, Rae L, Kwasniewska K, Raganelli A, Hanczaryk K, Lohan AJ, Loftus B, Graciet E, Wellmer F** (2012) Molecular basis for the specification of floral organs by APETALA3 and PISTILLATA. *Proc Natl Acad Sci U S A* **109**: 1011–1016.

**Xu ML, Hu TQ, McKim SM, Murmu J, Haughn GW, Hepworth SR** (2010) *Arabidopsis* BLADE-ON-PETIOLE1 and 2 promote floral meristem fate and determinacy in a previously undefined pathway targeting *APETALA1* and *APETALA3*. *Plant Cell* **22**: 1011–1020.

**Yamaguchi A, Wu M, Yang L, Wu G, Poethig RS, Wagner D** (2009) The microRNA-regulated SBP-box transcription factor SPL3 is a direct upstream activator of *LEAFY*, *FRUITFULL*, and *APETALA1*. *Dev Cell* **17**: 268–278.

**Yanagisawa S** (2004) Dof domain proteins: plant-specific transcription factors associated with diverse phenomena unique to plants. *Plant and Cell Physiology* **45**: 386–391.

**Yang Y, Jack T** (2004) Defining subdomains of the K domain important for protein-protein interactions of plant MADS proteins. *Plant Mol Biol* **55**: 45–59.

**Yang Z** (2007) PAML 4: phylogenetic analysis by maximum likelihood. *Mol Biol Evol* **24**: 1586–1591.

**Yant L, Mathieu J, Dinh TT, Ott F, Lanz C, Wollmann H, Chen X, Schmid M** (2010) Orchestration of the floral transition and floral development in *Arabidopsis* by the bifunctional transcription factor APETALA2. *Plant Cell* **22**: 1011–1020.

**Yao X, Ma H, Wang J, Zhang D** (2007) Genome-wide comparative analysis and expression pattern of TCP gene families in *Arabidopsis thaliana* and *Oryza sativa*. *Journal of Integrative Plant Biology* **49**: 885–897.

**Zahn LM, Kong H, Leebens-Mack JH, Kim S, Soltis PS, Landherr LL, Soltis DE, Depamphilis CW, Ma H** (2005) The evolution of the *SEPALLATA* subfamily of MADS-box genes: a preangiosperm origin with multiple duplications. *Mol Biol Evol* **22**: 1011–1020.

**Zhang J, Nei M** (1997) Accuracies of ancestral amino acid sequences inferred by the parsimony, likelihood, and distance methods. *J Mol Evol* **44 Suppl 1**: S139–146.

|                                                                                                                                                                                                                                                           |                                                                                                                                  | CAL |      |             |           |                        |                          |             |                                                                                                                                                                  |
|-----------------------------------------------------------------------------------------------------------------------------------------------------------------------------------------------------------------------------------------------------------|----------------------------------------------------------------------------------------------------------------------------------|-----|------|-------------|-----------|------------------------|--------------------------|-------------|------------------------------------------------------------------------------------------------------------------------------------------------------------------|
| Evidence                                                                                                                                                                                                                                                  | References                                                                                                                       | No. | Name | Position    | Sequence  | Putative cis - element | Binding TF               | Gene family | Gene expression pattern                                                                                                                                          |
| LFY directly induces expression of <i>API</i> , as evidenced by EMSA, LFY-GR system, and ChIP-qPCR.                                                                                                                                                       | (Weigel et al., 1992; Parcy et al., 1998; Wagner et al., 1999; William et al., 2004; Benlloch et al., 2011; Winter et al., 2011) |     |      | —           | —         |                        |                          |             |                                                                                                                                                                  |
| LFY directly induces expression of <i>API</i> , as evidenced by EMSA, LFY-GR system, and ChIP-qPCR.                                                                                                                                                       | (Weigel et al., 1992; Parcy et al., 1998; Wagner et al., 1999; William et al., 2004; Benlloch et al., 2011; Winter et al., 2011) | 1   | LFY  | -231 — -226 | CCAATG    | LFY binding site       | LEAFY                    |             | <i>LFY</i> is weakly expressed in young leaves during the vegetative phase, and strongly expressed in young primordia surrounding the inflorescence apex.        |
| SPL9 directly activates <i>API</i> , as evidenced by sequence prediction and ChIP-qPCR.                                                                                                                                                                   | (Wang et al., 2009)                                                                                                              |     |      | —           | —         |                        |                          |             |                                                                                                                                                                  |
|                                                                                                                                                                                                                                                           |                                                                                                                                  | 2   | MYB  | -252 — -247 | GGCAAT    | MYB binding site       | MYB genes                | MYB         |                                                                                                                                                                  |
| TCP4 could bind to the DNA sequence TGGTCCC, as revealed by EMSA. The putative TCP4 binding site is predicted based on the sequence similarity.                                                                                                           | (Yao et al., 2007; Nag et al., 2009; Aggarwal et al., 2010)                                                                      |     |      | —           | —         |                        |                          |             |                                                                                                                                                                  |
|                                                                                                                                                                                                                                                           |                                                                                                                                  | 3   | LMI1 | -326 — -318 | CAATTATTG | HD-Zip binding site    | LATE MERISTEM IDENTITY 1 | HD-Zip1     | <i>LMI1</i> is expressed in leaves of young seedlings during the vegetative stage, strongly expressed in the incipient flower primordia, and developing flowers. |
| PAN mediates BOP1 and 2 to the promoter of <i>API</i> , as evidenced by sequence prediction and ChIP-qPCR.                                                                                                                                                | (Foster et al., 1994; Chuang et al., 1999; Hepworth et al., 2005; Maier et al., 2009; Xu et al., 2010)                           | 4   | PAN  | -337 — -334 | ACGT      | TGA binding site       | PERIANTHIA               | bZIP        |                                                                                                                                                                  |
| Wigg et al., (2005) proposed this site as potential FD-binding site based on the evidence of sequence prediction and ChIP-qPCR, but Benlloch et al., (2011) indicated that this C-box is not needed for <i>API</i> activation based on the EMSA analysis. | (Wigge et al., 2005; Benlloch et al., 2011)                                                                                      | 4   | FD   | -338 — -333 | GACGTC    | C-box                  | FLOWERING LOCUS D        | bZIP        |                                                                                                                                                                  |
| <i>LMI2</i> directly activates expression of <i>API</i> , as evidenced by sequence prediction and ChIP-qPCR.                                                                                                                                              | (Pastore et al., 2011; Prouse and Campbell, 2012)                                                                                |     |      | —           | —         |                        |                          |             |                                                                                                                                                                  |
| SP3 directly promotes expression of <i>API</i> , as evidenced by EMSA and ChIP-qPCR. SPL9 directly activates expression of <i>API</i> , as evidenced by sequence prediction and ChIP-qPCR.                                                                | (Cardon et al., 1997; Yanagisawa, 2004; Wang et al., 2009)                                                                       |     |      | —           | —         |                        |                          |             |                                                                                                                                                                  |
| LFY directly induces expression of <i>API</i> , as evidenced by EMSA, LFY-GR system, and ChIP-qPCR, and this site has been demonstrated to be the most functionally important LFY binding site in the <i>API</i> promoter.                                | (Weigel et al., 1992; Parcy et al., 1998; Wagner et al., 1999; William et al., 2004; Benlloch et al., 2011)                      |     |      | —           | —         |                        |                          |             |                                                                                                                                                                  |
| This site is predicted based on the sequence similarity.                                                                                                                                                                                                  | (Toledo-Ortiz et al., 2003)                                                                                                      | 5   | bHLH | -411 — -406 | CACTTG    | E-box                  | bHLH genes               | bHLH        |                                                                                                                                                                  |
| AP2 and SMZ directly bind to the promoter region of <i>API</i> and repress its expression, as evidenced by sequence prediction and ChIP-qPCR.                                                                                                             | (Jofuku et al., 1994; Fujimoto et al., 2000; Mathieu et al., 2009; Yant et al., 2010; Dinh et al., 2012)                         |     |      | —           | —         |                        |                          |             |                                                                                                                                                                  |

|                                                                                                                                                                                                               |                                                                                                          |    |         |               |           |                  |                                            |          |                                                                                                                                                                                                      |
|---------------------------------------------------------------------------------------------------------------------------------------------------------------------------------------------------------------|----------------------------------------------------------------------------------------------------------|----|---------|---------------|-----------|------------------|--------------------------------------------|----------|------------------------------------------------------------------------------------------------------------------------------------------------------------------------------------------------------|
| PI could bind to this site, and restrict the expression of <i>API</i> during early stages of floral development by interacting with AP3 and other factors, as evidenced by sequence prediction and ChIP-qPCR. | (Goto and Meyerowitz, 1994; Sundstrom et al., 2006; Wuest et al., 2012)                                  | —  | —       |               |           |                  |                                            |          |                                                                                                                                                                                                      |
| This site is predicted based on the sequence similarity.                                                                                                                                                      | (Yamaguchi et al., 2009)                                                                                 | —  | —       |               |           |                  |                                            |          |                                                                                                                                                                                                      |
| SP3 directly promotes expression of <i>API</i> , as evidenced by EMSA and ChIP-qPCR.                                                                                                                          | (Cardon et al., 1997; Yamaguchi et al., 2009)                                                            | —  | —       |               |           |                  |                                            |          |                                                                                                                                                                                                      |
| AP1 controls the onset of flowering by activating itself, as evidenced by sequence prediction and ChIP-qPCR.                                                                                                  | (Mandel et al., 1992; Kaufmann et al., 2010; Benlloch et al., 2011)                                      | —  | —       |               |           |                  |                                            |          |                                                                                                                                                                                                      |
| SPL3 directly promotes expression of <i>API</i> , as evidenced by EMSA and ChIP-qPCR.                                                                                                                         | (Cardon et al., 1997; Yamaguchi et al., 2009)                                                            | 6  | SPL3    | -911 — -905   | CGTACTA   | GTAC box         | SQUAMOSA PROMOTER-BINDING PROTEIN-LIKE 3   | SPL      |                                                                                                                                                                                                      |
| PAN mediates BOP1 and 2 to the promoter of <i>API</i> , as evidenced by sequence prediction and ChIP-qPCR.                                                                                                    | (Foster et al., 1994; Chuang et al., 1999; Hepworth et al., 2005; Maier et al., 2009; Xu et al., 2010)   | 6  | PAN     | -912 — -909   | ACGT      | TGA binding site | PERIANTHIA                                 | bZIP     |                                                                                                                                                                                                      |
| AP2 and SMZ directly bind to the promoter region of <i>API</i> and repress its expression, as evidenced by sequence prediction and ChIP-qPCR.                                                                 | (Jofuku et al., 1994; Fujimoto et al., 2000; Mathieu et al., 2009; Yant et al., 2010; Dinh et al., 2012) | 7  | AP2/SMZ | -1486 — -1481 | TTTGTT    |                  | AP2/SMZ                                    | AP2      | <i>AP2</i> is expressed in the inflorescence meristem and in all four types of floral organs. <i>SMZ</i> is expressed in hypocotyl, cotyledons, meristematic region of 7-d-old seedlings, and seeds. |
|                                                                                                                                                                                                               |                                                                                                          | 8  | LFY     | 319 — 324     | CCACTG    | LFY binding site | LEAFY                                      | LFY      | <i>LFY</i> is weakly expressed in young leaves during the vegetative phase, and strongly expressed in young primordia surrounding the inflorescence apex.                                            |
| This site is predicted based on the sequence similarity.                                                                                                                                                      | (Rushton et al., 2010)                                                                                   | 9  | WRKY    | 795 — 800     | TTGACC    | W-box            | WRKY genes                                 | WRKY     |                                                                                                                                                                                                      |
|                                                                                                                                                                                                               |                                                                                                          | 10 | SPL3/9  | 851 — 856     | CCGTAC    | GTAC box         | SQUAMOSA PROMOTER-BINDING PROTEIN-LIKE 3/9 | SPL      |                                                                                                                                                                                                      |
| This site is predicted based on the sequence similarity.                                                                                                                                                      | (Unte et al., 2003; Birkenbihl et al., 2005)                                                             | —  | —       |               |           |                  |                                            |          |                                                                                                                                                                                                      |
|                                                                                                                                                                                                               |                                                                                                          | 11 | MYB98   | 1375 — 1383   | TTTAACATA | MYB binding site | MYB98                                      | R2R3-MYB |                                                                                                                                                                                                      |
|                                                                                                                                                                                                               |                                                                                                          | 12 | ARR1/2  | 3065 — 3073   | TATGATTGT |                  | <i>Arabidopsis</i> response regulators 1/2 | ARR      |                                                                                                                                                                                                      |
| This site is predicted based on AthaMap.                                                                                                                                                                      |                                                                                                          | —  | —       |               |           |                  |                                            |          |                                                                                                                                                                                                      |

on. *Development* **136**: 1613-1620.

opment **138**: 3189-3198.

*VER*. *Development* **133**: 1673-1682.

*sis*. *Plant J* **59**: 987-1000.

6-41.

otic stimulus response. *Dev Cell* **20**: 430-443.

ceedings of the National Academy of Sciences, USA **109**: 13452-13457.

*AGAMOUS-LIKE24*. *Plant Journal* **63**: 974-989.

: 2156-2170.

tions throughout angiosperm history. *Genetics* **169**: 2209-2223.

| Gene function                                                                                                                                                                 | Evidence                                                                                                    | References                                                                        |
|-------------------------------------------------------------------------------------------------------------------------------------------------------------------------------|-------------------------------------------------------------------------------------------------------------|-----------------------------------------------------------------------------------|
| <i>LFY</i> controls the production of the flowers, and activates the floral homeotic genes that specify the identity of organs in the flower.                                 | <i>LFY</i> directly induces expression of <i>CAL</i> , as evidenced by <i>LFY</i> -GR system and CHIP-qPCR. | (Weigel et al., 1992; William et al., 2004)                                       |
|                                                                                                                                                                               | This site is predicted based on the sequence similarity.                                                    | (Rosinski and Atchley, 1998)                                                      |
| <i>LMII</i> is a meristem identity regulator and acts together with <i>LFY</i> to induce the expression of <i>CAL</i> . <i>LMII</i> may also play roles in bracts and leaves. | <i>LMII</i> directly promotes expression of <i>CAL</i> , as evidenced by sequence prediction and ChIP-PCR.  | (Saddic et al., 2006)                                                             |
|                                                                                                                                                                               | This site is predicted based on the sequence similarity.                                                    | (Foster et al., 1994; Hepworth et al., 2005; Maier et al., 2009; Xu et al., 2010) |
|                                                                                                                                                                               | This site is predicted based on the sequence similarity to <i>API</i> .                                     |                                                                                   |
|                                                                                                                                                                               | This site is predicted based on the sequence similarity.                                                    | (Toledo-Ortiz et al., 2003)                                                       |

---

---

---

---

This site is predicted based on the sequence similarity to *AP1*.

---

This site is predicted based on the sequence similarity. (Foster et al., 1994; Xu et al., 2010)

---

*AP2* plays a central role in the establishment of the floral meristem, the specification of floral organ identity and the regulation of floral homeotic gene expression. *SMZ* is a repressor of flowering. *AP2* directly binds to the promoter region of *CAL* and represses its expression, as evidenced by sequence prediction and ChIP-qPCR. (Jofuku et al., 1994; Fujimoto et al., 2000; Mathieu et al., 2009; Dinh et al., 2012)

---

*LFY* controls the production of the flowers, and activates the floral homeotic genes that specify the identity of organs in the flower. This site is predicted based on the sequence similarity. (Benlloch et al., 2011)

---

This site is predicted based on the sequence similarity. (Rushton et al., 2010)

---

This site is predicted based on AthaMap.

---

This site is predicted based on AthaMap.

---

This site is predicted based on AthaMap.

---

---
