# Supplementary material
Source: PubMed Central journal article supplement (PMC4902614)
Supplement: supp_pp.16.00320_PP2016-00320DR1_Supplemental_Tables_S2_S5.pdf [file supp_pp.16.00320_PP2016-00320DR1_Supplemental_Tables_S2_S5.pdf]

Supplemental Table S2. Sequences and positions of the TFBSs shown in

Supplemental Figure S5.

| Name                 | <i>API</i>                | <i>AlyAPI</i>             | <i>CruAPI</i>             | <i>TpaAPI</i>             | <i>AarAPI</i>           | <i>CAL</i>               | <i>AlyCAL</i>            | <i>CruCAL</i>             | <i>TpaCAL</i>            | <i>AarCAL</i>             | <i>Tha01189</i>           | <i>Tha13754</i>           | <i>CpaAPI</i>            |
|----------------------|---------------------------|---------------------------|---------------------------|---------------------------|-------------------------|--------------------------|--------------------------|---------------------------|--------------------------|---------------------------|---------------------------|---------------------------|--------------------------|
| <b>LFY"</b>          | CCACTG<br>(-255/-250)     | /                         | /                         | /                         | /                       | /                        | /                        | /                         | /                        | /                         | /                         | /                         | /                        |
| <b>LFY</b>           | CCAATG<br>(-289/-284)     | CCAATG<br>(-289/-284)     | CCAATG<br>(-297/-292)     | CCAATG<br>(-288/-283)     | CCAATG<br>(-284/-279)   | CCAATG<br>(-231/-226)    | CCAATG<br>(-262/-257)    | CCAATG<br>(-263/-258)     | /                        | /                         | CCAATG<br>(-339/-334)     | CCAATG<br>(-357/-352)     | CCAGTG<br>(-409/-404)    |
| <b>SPL9</b>          | GTAC<br>(-301/-298)       | GTAC<br>(-301/-298)       | GTAC<br>(-309/-306)       | GTAC<br>(-299/-296)       | GTAC<br>(-296/-293)     | /                        | /                        | /                         | /                        | /                         | GTAC<br>(-350/-347)       | GTAC<br>(-367/-364)       | /                        |
| <b>MYB</b>           | /                         | /                         | /                         | /                         | /                       | GGCAAT<br>(-252/-247)    | GGCAAT<br>(-283/-278)    | GGCAAT<br>(-284/-279)     | GGCAAT<br>(-307/-302)    | /                         | /                         | /                         | /                        |
| <b>TCP4</b>          | ATGGACCC<br>(-316/-309)   | ATGGACCC<br>(-316/-309)   | ATGGACCC<br>(-324/-317)   | GTGGACCC<br>(-314/-307)   | /                       | /                        | /                        | /                         | /                        | /                         | GTGGACCC<br>(-365/-358)   | GTGGACCA<br>(-391/-384)   | /                        |
| <b>LMI1</b>          | /                         | /                         | /                         | /                         | /                       | CAATTATTG<br>(-326/-318) | CAATTACTG<br>(-354/-346) | CAATTATTG<br>(-370/-362)  | CAATTACTG<br>(-375/-367) | /                         | /                         | /                         | /                        |
| <b>PAN</b>           | ACGT<br>(-376/-373)       | /                         | ACGT<br>(-384/-381)       | ACGT<br>(-400/-397)       | ACGT<br>(-360/-357)     | ACGT<br>(-337/-334)      | ACGT<br>(-365/-362)      | ACGT<br>(-382/-379)       | ACGT<br>(-386/-383)      | /                         | /                         | /                         | /                        |
| <b>FD</b>            | GACGTC<br>(-377/-372)     | /                         | GACGTC<br>(-385/-380)     | GACGTC<br>(-401/-396)     | GACGTC<br>(-361/-356)   | GACGTC<br>(-338/-333)    | GACGTC<br>(-366/-361)    | GACGTT<br>(-383/-378)     | GACGTC<br>(-387/-382)    | /                         | /                         | /                         | /                        |
| <b>LMI2</b>          | ACTTACC<br>(-399/-393)    | ACTTACC<br>(-398/-392)    | /                         | /                         | /                       | /                        | /                        | /                         | /                        | /                         | ACTGACC<br>(-454/-448)    | ACTGACC<br>(-476/-470)    | /                        |
| <b>SPL3/9</b>        | GTCCGTACAA<br>(-413/-404) | GTCCGTACAA<br>(-412/-403) | GTCCGTACAA<br>(-431/-422) | GTCCGTACAA<br>(-431/-422) | /                       | /                        | /                        | GTCCGTACAC<br>(-445/-436) | /                        | CTCCGTACAA<br>(-307/-298) | GTCCGTACCA<br>(-475/-466) | GTCCGTACAA<br>(-501/-492) | /                        |
| <b>LFY'</b>          | CCAGTG<br>(-419/-414)     | CCAGTG<br>(-418/-413)     | CCAGTG<br>(-437/-432)     | CCACTG<br>(-437/-432)     | /                       | /                        | /                        | /                         | /                        | /                         | /                         | /                         | /                        |
| <b>bHLH</b>          | CACTTG<br>(-433/-428)     | CACTTG<br>(-432/-427)     | CACTTG<br>(-451/-446)     | CACTTG<br>(-451/-446)     | CACTTG<br>(-404/-399)   | CACTTG<br>(-411/-406)    | CACTTG<br>(-432/-427)    | CACTTG<br>(-467/-462)     | CACTTG<br>(-453/-448)    | CACTTG<br>(-326/-321)     | CACTTG<br>(-494/-489)     | CACTTG<br>(-520/-515)     | CACTTG<br>(-506/-501)    |
| <b>AP2/<br/>SMZ'</b> | TTTGTT<br>(-487/-482)     | TTTGTT<br>(-486/-481)     | /                         | TTTGTT<br>(-505/-500)     | TTTGTT<br>(-458/-453)   | /                        | /                        | /                         | /                        | /                         | /                         | /                         | /                        |
| <b>PI</b>            | GCAAATTTGA<br>(-603/-594) | GCAAATTTGA<br>(-602/-593) | ACAAATTTGA<br>(-617/-608) | /                         | /                       | /                        | /                        | /                         | /                        | /                         | /                         | /                         | /                        |
| <b>Dof</b>           | AAAGAAAG<br>(-658/-651)   | AAAGAAAG<br>(-654/-647)   | AAAAAAAG<br>(-675/-668)   | AAAAAAAG<br>(-666/-659)   | AAAGAAAG<br>(-598/-591) | /                        | /                        | /                         | /                        | /                         | AAGAAAG<br>(-667/-661)    | /                         | AGAAAAAG<br>(-754/-747)  |
| <b>SPL3</b>          | CGTACAA<br>(-733/-727)    | CGTACAA<br>(-729/-723)    | CGTACAA<br>(-757/-751)    | /                         | /                       | /                        | /                        | /                         | /                        | /                         | /                         | /                         | /                        |
| <b>AP1</b>           | CTATTTTGG<br>(-805/-796)  | CTATTTTGG<br>(-800/-791)  | /                         | /                         | /                       | /                        | /                        | /                         | /                        | /                         | /                         | CTATTTTAGG<br>(-868/-859) | /                        |
| <b>SPL3</b>          | CGTACAA<br>(-948/-942)    | AGTACAA<br>(-919/-913)    | AGTACCA<br>(-954/-948)    | CGTACGA<br>(-913/-907)    | AGTACTA<br>(-940/-934)  | CGTACTA<br>(-911/-905)   | /                        | TGTACAA<br>(-905/-898)    | AGTACAG<br>(-1189/-1183) | /                         | GTACAG<br>(-896/-890)     | /                         | AGTACTT<br>(-1180/-1174) |
| <b>PAN</b>           | ACGT<br>(-949/-946)       | /                         | /                         | ACGT<br>(-914/-911)       | /                       | ACGT<br>(-912/-909)      | /                        | /                         | /                        | /                         | /                         | /                         | /                        |
| <b>AP2/<br/>SMZ</b>  | TTTGTT<br>(-1858/-1853)   | TTTGTT<br>(-1747/-1742)   | TTTGTT<br>(-1857/-1852)   | TTTGTT<br>(-1767/-1762)   | AACAAA<br>(-1713/-1708) | TTTGTT<br>(-1486/-1481)  | TTTGTT<br>(-1349/-1344)  | AACAAA<br>(-1361/-1359)   | TTTGTT<br>(-1290/-1285)  | AACAAA<br>(-1372/-1367)   | TTTGTT<br>(-1847/-1842)   | TTTGTT<br>(-1873/-1868)   | AACAAA<br>(-1929/-1924)  |

Supplemental Table S3. *API*- and *CAL*-like genes included in this study.

| <b>Taxon</b>                 | <b>Gene</b>     | <b>Accession No.</b>            | <b>Source</b> |
|------------------------------|-----------------|---------------------------------|---------------|
| <i>Arabidopsis thaliana</i>  | <i>API</i>      | At1g69120                       | TAIR10        |
|                              | <i>CAL</i>      | At1g26310                       | TAIR10        |
| <i>Arabidopsis lyrata</i>    | <i>AlyAPI</i>   | 476039                          | Phytozome 9.1 |
|                              | <i>AlyCAL</i>   | 921628                          | Phytozome 9.1 |
| <i>Capsella rubella</i>      | <i>CruAPI</i>   | Carubv10022005m.g               | Phytozome 9.1 |
|                              | <i>CruCAL</i>   | Carubv10011954m.g               | Phytozome 9.1 |
| <i>Thellungiella parvula</i> | <i>TpaAPI</i>   | AFAN01000026.1:1131966/1128287  | GenBank       |
|                              | <i>TpaCAL</i>   | AFAN01000001.1: 8231573/8235104 | GenBankI      |
| <i>Aethionema arabicum</i>   | <i>AarAPI</i>   | KE153490.1:210765/224506        | GenBank       |
|                              | <i>AarCAL</i>   | KE150702.1:473531/469589        | GenBank       |
| <i>Tarenaya hassleriana</i>  | <i>Tha13754</i> | KE705813.1: 564960/560792       | GenBank       |
|                              | <i>Tha01189</i> | KE705860.1: 102975/98186        | GenBank       |
| <i>Carica Papaya</i>         | <i>CpaAPI</i>   | evm.TU.supercontig_1.16         | Phytozome 9.1 |

Supplemental Table S4. Primer sequences used in this study.

| Purpose               | Primer name                            | Forward primer (5'-3')           | Reverse primer (5'-3')        |
|-----------------------|----------------------------------------|----------------------------------|-------------------------------|
| In situ hybridization | <i>AthAPI</i>                          | ATGTACGAGTCCATCAATGAGC           | T7-AAGCAGCCAAGGTTGCAGTTG      |
|                       | <i>AthCAL</i>                          | AATGAGTCCCTCAACCACCTCC           | T7-CGTAACAGCCAAGGTAATT        |
| qRT-PCR               | <i>AthAPI</i>                          | CAGCAGCACCAAATCCAGC              | GAGCCTAGCCACTATTTATATG        |
|                       | <i>AthCAL</i>                          | CCATTTCAACACCCCATC               | TCATGAGTAGAGGATCGATC          |
|                       | <i>AthACTIN</i>                        | CATGCCATCCTCCGTCTTG              | GCTCTGCTGTTGTGGTGAAC          |
|                       | <i>CruAPI</i>                          | CAGCAACACCAAATCCAGC              | CGTTTCTCCTCATTGCCATTGG        |
|                       | <i>CruCAL</i>                          | CAACCGCAACAGTTTCAACC             | GGTACATTCCACCCATATTTAGG       |
|                       | <i>CruACTIN</i>                        | GACTACGAGCAAGAGATGG              | GGAACAAGACTTCTGGGC            |
|                       | <i>GUS</i>                             | CCTGCGTCAATGTAATGTTT             | GTGATGATAATCGGCTGATG          |
| Genotyping            | <i>GUS</i>                             | GCGTGGTGATGTGGAGTATTG            | GATCCCTTTCTTGTACC GCC         |
| <i>API</i> constructs | <i>API<sub>intr1</sub></i>             | CTCCACTGAAGCTTGGTAACTTC          | CATAGCGTTCAAGTATCTTCTCGAGACTG |
|                       | <i>API<sub>pro2887</sub></i>           | AGGTACCTGTGTGTAGCTGCGTAT         | TGAACCCTACCCTTAAGCTTTTTG      |
|                       | <i>API<sub>pro2887(mut805-7)</sub></i> | CAATTCAGTCGACTGGATCC             | TTTCAAACGGTTAATTAAGTATTTGTCAA |
|                       | <i>96)+intr1-up</i>                    |                                  | AGATTTGTCAATGT                |
|                       | <i>API<sub>pro2887(mut805-7)</sub></i> | CAAAATACTTAATTAACCGTTTGAAATTTTTG | GCGGGATATCACCACCTTTGTAC       |
|                       | <i>96)+intr1-down</i>                  | AATACTTACAATTATTC                |                               |
|                       | <i>API<sub>pro1163</sub></i>           | GCCTTAAGCAAATGCCGGATCCG          | TTCCATTCTCGAGCCTTTTTTA        |
|                       | <i>API<sub>pro855</sub></i>            | CCGGATCCTCTACAACCTAATAAG         | TTCCATTCTCGAGCCTTTTTTA        |
|                       | <i>API<sub>pro755</sub></i>            | CTTCTGGATCCCTCTCTTTCC            | TTCCATTCTCGAGCCTTTTTTA        |
|                       | <i>API<sub>pro577</sub></i>            | AGGGTACCCACCTTATTC               | TTCCATTCTCGAGCCTTTTTTA        |
|                       | <i>API<sub>pro276</sub></i>            | ACCAATGAGGATCCGACACGC            | TTCCATTCTCGAGCCTTTTTTA        |
| <i>CAL</i> constructs | <i>CAL<sub>intr1</sub></i>             | GTTGAGTACTCCTCGGTACCTTGG         | CGTTCGAGCTCCTTCTCGAGGCTAC     |
|                       | <i>CAL<sub>pro1210</sub></i>           | GACGGATCCACAACACTCAAAC           | TTCAACCCTACCGGTACCCTGTTCTC    |
|                       | <i>CAL<sub>pro1210(mut703)</sub></i>   | CAATTCAGTCGACTGGATCC             | ATTTTGAAGTTTGCCAAAAATAGGAAATA |
|                       | <i>693)+intr1-up</i>                   |                                  | TCCAAAATACAAATTACCATAAGTTT    |
|                       | <i>CAL<sub>pro1210(mut703)</sub></i>   | TTCTATTTTTGGCAAACCTCAAATAATTTT   | GCGGGATATCACCACCTTTGTAC       |
|                       | <i>693)+intr1-down</i>                 | CTTCTGCT                         |                               |
|                       | <i>CAL<sub>pro1109</sub></i>           | ATGGACAAAGGAGGAGGTACCGC          | CCCATTTCTCTCGAGATAAC          |
|                       | <i>CAL<sub>pro850</sub></i>            | GGTCTGCTTAAAGGTACCATGG           | CCCATTTCTCTCGAGATAAC          |
|                       | <i>CAL<sub>pro521</sub></i>            | CCTCTATAACTACTTGGATCCATT         | CCCATTTCTCTCGAGATAAC          |
|                       | <i>CAL<sub>pro340</sub></i>            | CCATTTTCAGGTACCTAGACGTCG         | CCCATTTCTCTCGAGATAAC          |
|                       | <i>CAL<sub>pro240</sub></i>            | AGGCAATGGTACCCTAATCAGACC         | CCCATTTCTCTCGAGATAAC          |
| EMSA                  | <i>AthAPI</i>                          | AAAGGATCAACCATGGGAAGG            | TATATGGAAATCTCGAGTGCG         |
|                       | <i>AthCAL</i>                          | GTTATTTTAAGAGCCATGGGAAG          | GATGTAGTCTCGAGAGCGG           |
|                       | <i>CruAPI</i>                          | ACCATGGGAAGGGGTAGGGTTC           | CTCGAGTGCAGCGAAGCAGCCAAGGTTG  |
|                       | <i>CruCAL</i>                          | ACCATGGGAAGGGGTAGGGTTC           | CTCGAGTGCAGCGTAACAACCAAGG     |

Note: Sequences underlined represent the restriction enzyme sites.

Supplemental Table S5. Independent transgenic lines examined by GUS-staining analyses.

| <b>construct name</b>                          | <b>No. of independent lines examined by GUS staining</b> | <b>No. of lines showing the representative spatiotemporal expression pattern</b> |
|------------------------------------------------|----------------------------------------------------------|----------------------------------------------------------------------------------|
| <i>API<sub>pro2887+intr1</sub></i>             | 47                                                       | 40(85%)                                                                          |
| <i>API<sub>pro1163</sub></i>                   | 33                                                       | 27(81.8%)                                                                        |
| <i>API<sub>pro855</sub></i>                    | 34                                                       | 26(76.5%)                                                                        |
| <i>API<sub>pro755</sub></i>                    | 65                                                       | 65(100%)                                                                         |
| <i>API<sub>pro577</sub></i>                    | 97                                                       | 70(72.2%)                                                                        |
| <i>API<sub>pro276</sub></i>                    | 30                                                       | 30(100%)                                                                         |
| <i>API<sub>pro2887(mut805-796)+intr1</sub></i> | 31                                                       | 24(77.4%)                                                                        |
| <i>CAL<sub>pro1210+intr1</sub></i>             | 47                                                       | 39(83%)                                                                          |
| <i>CAL<sub>pro1109</sub></i>                   | 53                                                       | 40(75.5%)                                                                        |
| <i>CAL<sub>pro850</sub></i>                    | 57                                                       | 49(86%)                                                                          |
| <i>CAL<sub>pro521</sub></i>                    | 48                                                       | 48(100%)                                                                         |
| <i>CAL<sub>pro340</sub></i>                    | 60                                                       | 47(78.3%)                                                                        |
| <i>CAL<sub>pro240</sub></i>                    | 41                                                       | 29(70.7%)                                                                        |
| <i>CAL<sub>pro1210(mut703-693)+intr1</sub></i> | 55                                                       | 53(93.4%)                                                                        |
